# Supplementary material for: An ultralight aerogel-type urea absorbent for the development of a wearable artificial kidney
Source: Royal Society of Chemistry journal article supplement (doi:10.1039/d3nj00432e), 2023-01-01
Supplement: d3nj00432e1.pdf [file d3nj00432e1.pdf]

## Supporting Information

### An ultralight aerogel-type urea absorbent for the development of a wearable artificial kidney

Yaping Yuan, ‡<sup>a</sup> Jing Li, ‡<sup>b,\*</sup> Chenyuan Guo,<sup>c</sup> Lili Zhang,<sup>a</sup> Yuyan Song,<sup>a</sup> Yanli He,<sup>a</sup>

Yankun Luo<sup>d</sup> and Shuguang Shen<sup>a,\*1</sup>

#### 1. Calculation of the Segal crystallinity index

Relative crystallinity of cellulose, was determined using Eq. (1), Eq. (2).<sup>1,2</sup>

$$\text{Cellulose I: } \text{CrI}\% = \frac{I_{(002)} - I_{\text{am}}}{I_{(002)}} \times 100 \quad (1)$$

$$\text{Cellulose II: } \text{CrI}\% = \frac{I_{(110)} - I_{\text{am}}}{I_{(110)}} \times 100 \quad (2)$$

where  $I_{(002)}$  and  $I_{(110)}$  are the diffraction intensity of the central crystalline peak (002) and (110).  $I_{\text{am}}$  was the diffraction intensity of the amorphous cellulose.

#### 2. Adsorption thermodynamics

---

<sup>1</sup> <sup>a</sup> College of Chemical Engineering and Technology, Taiyuan University of Technology, Taiyuan 030024, China.

<sup>b</sup> College of Biomedical Engineering, Taiyuan University of Technology, Taiyuan 030024, China.

<sup>c</sup> Shanxi Beifang Xingan Chemical Industry Co., Ltd, Taiyuan 030023, China.

<sup>d</sup> Shanxi Provincial People's Hospital, Taiyuan, China.

\* Corresponding author: Shuguang Shen, Jing Li

Corresponding author E-mail: [shenshuguang@tyut.edu.cn](mailto:shenshuguang@tyut.edu.cn) and [sgshen@sina.com](mailto:sgshen@sina.com)

Corresponding Author Address: College of Chemical Engineering and Technology, Taiyuan University of Technology, Taiyuan 030024, China, Tel. (+86) 13303511628.

† Electronic supplementary information (ESI) available: The mechanism of urea adsorption on cellulose aerogels was investigated by adsorption thermodynamics and kinetics. Formulas and any associated references are available in the ESI.

‡ Yaping Yuan and Jing Li contributed equally to this work. Yaping Yuan and Jing Li should be considered co-first authors.

The adsorption processes of cellulose aerogel to urea at 25, 37 and 50 °C were investigated by Langmuir, Freundlich model in the work.

The linear equation of Langmuir model is as follows:

$$\frac{C_e}{q_e} = \frac{1}{K_L q_{\max}} + \frac{C_e}{q_{\max}} \quad (3)$$

Where  $q_e$  is the adsorbed amount of urea in an equilibrium state, mg/g;  $C_e$  represents the equilibrium concentration of urea, mg/L;  $C_0$  is the initial concentration of urea, mg/L;  $K_L$  represents the adsorption equilibrium constants of the Langmuir model, L/g;  $q_{\max}$  is the theoretical maximum adsorption capacity of Langmuir models, mg/g.

The linear equation of Freundlich model is given by:

$$\log q_e = \log K_f + \frac{1}{n} \log C_e \quad (4)$$

The "1/n" in the Freundlich isotherm model reflects the intensity of adsorption. If the value of 1/n is less than 0.5 means that the adsorbate is easily adsorbed; while the value more than 2, the adsorption is unfavorable.<sup>3</sup>

Where  $q_e$  and  $C_e$  are the same as Eq. (3);  $K_f$  represents the adsorption equilibrium constants of the Freundlich model, mg/(g·(mg/L)<sup>1/n</sup>);

The Gibb's free energy ( $\Delta G$ ,<sup>4</sup> kJ/mol), adsorption enthalpy ( $\Delta H$ , kJ/mol) and entropy of adsorption ( $\Delta S$ , J/(mol·K)) were calculated to better analysis the mechanism of the adsorption process. The formulas are as follows:

$$K = K_f^n \quad (5)$$

$$\Delta G = -nRT \quad (6)$$

$$\ln K = -\frac{\Delta H}{RT} + C \quad (7)$$

$$\Delta S = \frac{\Delta H - \Delta G}{T} \quad (8)$$

### 3. Adsorption kinetics

Kinetic experiments were carried out to study the adsorption behavior of urea by cellulose aerogel. The experimental data were fitted and analyzed by pseudo-first-order kinetic (PFO), pseudo-second-order kinetic (PSO) model.

The equation of PFO is given in the following:

$$\log(q_e - q_t) = \log(q_e) - \left(\frac{k_1 t}{2.303}\right) \quad (9)$$

The equation of PSO is given in the following:

$$\frac{t}{q_t} = \frac{1}{k_2 q_e^2} + \frac{t}{q_e} \quad (10)$$

where  $q_e$  is the adsorbed amount of urea in an equilibrium state, mg/g;  $q_t$  is the adsorption capacity at time  $t$ , mg/g;  $k_1$  is the rate constant of the PFO model,  $\text{min}^{-1}$ ;  $k_2$  is the rate constant of the PSO model,  $\text{g}/(\text{mg} \cdot \text{min})$ .

The apparent rate constant  $k_1$  was determined from the kinetic experimental data and used to calculate the apparent activation energy. It can be estimated in linear form by the following equation:

$$\ln k = \ln A - \frac{E_a}{RT} \quad (11)$$

where  $k$  is the apparent rate constant,  $\text{min}^{-1}$ ;  $A$  is the pre-exponential factor,  $\text{min}^{-1}$ ;  $E_a$  is the apparent activation energy, kJ/mol.

Since the PFO and PSO model did not provide the information on the diffusion of urea adsorbed by 3CA, an intraparticle diffusion model was used to explain the diffusion mechanism.

$$q_t = K_{id}t^{0.5} + C \quad (12)$$

where  $K_{id}$  is the intraparticle diffusion rate constant,  $\text{mg}/(\text{g}\cdot\text{min}^{0.5})$ ;  $C$  is a constant related to the thickness of boundary layer,  $\text{mg}/\text{g}$ .

## Notes and references

- 1 A. Kljun, T. A. Benians, F. Goubet, F. Meulewaeter, J. P. Knox and R. S. Blackburn, *Biomacromolecules.*, 2011, **12**, 4121-4126.
- 2 Y. Xia, X. Li, Y. Yuan, J. Zhuang and W. Wang, *Cellulose.*, 2021.
- 3 S. Fan, Y. Wang, Z. Wang, J. Tang, J. Tang and X. Li, *J. Environ. Chem. Eng.*, 2017, **5**, 601-611.
- 4 F. Xue, F. Wang, S. Chen, S. Ju and W. Xing, *J. Chem. Eng. Data.*, 2017, **62**, 4266-4272.
